# Supplementary material for: Change in Plant-Based Diet Quality Is Associated with Changes in Plasma Adiposity-Associated Biomarker Concentrations in Women
Source: PubMed Central journal article supplement (PMC6461739; doi:10.1093/jn/nxy301), 2019-03-30
Supplement: nxy301_supplement_tables.pdf [file nxy301_supplement_tables.pdf]

## Supplementary data

**Supplemental Table 1** Changes in food group intakes among quintiles of changes in plant-based diet indices in the Nurses' Health study II<sup>1</sup>

|                                                      | Quintile 1   | Quintile 2   | Quintile 3 | Quintile 4 | Quintile 5 | <i>P</i> |
|------------------------------------------------------|--------------|--------------|------------|------------|------------|----------|
| <b>Overall plant-based diet index (PDI)</b>          |              |              |            |            |            |          |
| <i>n</i>                                             | 161          | 162          | 197        | 131        | 180        |          |
| Median (range)                                       | -6 (-18, -4) | -1.5 (-3, 0) | 3 (1, 4)   | 6 (5, 7)   | 10 (8, 27) |          |
| <b><i>Healthy plant foods, servings/day</i></b>      |              |              |            |            |            |          |
| Whole grains                                         | -0.7 ± 1.4   | -0.2 ± 1.2   | -0.1 ± 1.4 | 0.0 ± 1.1  | 0.2 ± 1.2  | <0.001   |
| Fruits                                               | 0.0 ± 1.2    | 0.3 ± 1.2    | 0.4 ± 1.1  | 0.3 ± 0.9  | 0.5 ± 0.9  | <0.001   |
| Vegetables                                           | -0.3 ± 2.1   | 0.4 ± 1.8    | 0.5 ± 2.2  | 0.6 ± 1.9  | 0.9 ± 1.7  | <0.001   |
| Nuts                                                 | 0.5 ± 0.9    | 0.6 ± 1.0    | 0.7 ± 1.2  | 0.5 ± 0.8  | 0.7 ± 1.0  | 0.08     |
| Legumes                                              | -0.1 ± 0.6   | 0.0 ± 0.5    | 0.1 ± 0.5  | 0.2 ± 0.7  | 0.2 ± 0.4  | <0.001   |
| Vegetable oil                                        | 0.3 ± 0.6    | 0.4 ± 0.6    | 0.3 ± 0.7  | 0.4 ± 0.7  | 0.5 ± 0.6  | 0.007    |
| Tea and coffee                                       | -0.2 ± 1.9   | -0.3 ± 1.8   | 0.1 ± 1.8  | 0.1 ± 1.6  | 0.3 ± 1.7  | 0.001    |
| <b><i>Less healthy plant foods, servings/day</i></b> |              |              |            |            |            |          |
| Fruit juices                                         | -0.6 ± 0.8   | -0.4 ± 0.6   | -0.3 ± 0.6 | -0.2 ± 0.6 | -0.1 ± 0.9 | <0.001   |
| Refined grains                                       | -1.1 ± 1.3   | -1.1 ± 1.3   | -0.8 ± 1.3 | -0.7 ± 1.2 | -0.5 ± 1.1 | <0.001   |
| Potatoes                                             | -0.2 ± 0.4   | -0.2 ± 0.3   | -0.1 ± 0.3 | -0.1 ± 0.3 | 0.0 ± 0.3  | <0.001   |
| Sugar-sweetened beverages                            | -0.4 ± 1.0   | -0.2 ± 0.6   | -0.2 ± 0.6 | -0.2 ± 0.7 | -0.1 ± 0.7 | <0.001   |
| Sweets and desserts                                  | -0.8 ± 1.2   | -0.5 ± 1.0   | -0.7 ± 1.2 | -0.4 ± 1.1 | -0.1 ± 1.0 | <0.001   |
| <b><i>Animal foods, servings/day</i></b>             |              |              |            |            |            |          |
| Animal fat                                           | 0.4 ± 0.8    | 0.4 ± 0.6    | 0.2 ± 0.5  | 0.2 ± 0.6  | 0.1 ± 0.5  | <0.001   |
| Daily                                                | 0.5 ± 1.7    | 0.5 ± 1.7    | 0.0 ± 1.4  | -0.1 ± 1.8 | -0.2 ± 1.8 | <0.001   |
| Eggs                                                 | 0.2 ± 0.3    | 0.1 ± 0.3    | 0.1 ± 0.3  | 0.1 ± 0.5  | 0.0 ± 0.3  | <0.001   |
| Fish and seafood                                     | 0.0 ± 0.2    | 0.0 ± 0.2    | 0.0 ± 0.2  | 0.0 ± 0.2  | 0.0 ± 0.2  | 0.17     |
| Meat                                                 | 0.0 ± 0.6    | -0.1 ± 0.7   | 0.0 ± 0.6  | -0.1 ± 0.7 | -0.1 ± 0.7 | 0.032    |
| Miscellaneous animal-based foods                     | -0.2 ± 1.3   | -0.2 ± 1.9   | -0.1 ± 0.8 | -0.3 ± 1.5 | -0.4 ± 1.3 | 0.10     |
| <b><i>Food groups, servings/day</i></b>              |              |              |            |            |            |          |
| Healthy plant foods                                  | -0.5 ± 4.4   | 1.2 ± 3.9    | 2.0 ± 4.6  | 2.1 ± 3.4  | 3.3 ± 3.6  | <0.001   |
| Less healthy plant foods                             | -3.3 ± 2.5   | -2.4 ± 2.0   | -2.2 ± 2.1 | -1.6 ± 2.1 | -0.9 ± 2.0 | <0.001   |

## Supplementary data

|                                                      |              |             |            |            |            |        |
|------------------------------------------------------|--------------|-------------|------------|------------|------------|--------|
| Animal foods                                         | 0.9 ± 2.5    | 0.7 ± 2.6   | 0.2 ± 1.9  | -0.2 ± 2.8 | -0.6 ± 2.7 | <0.001 |
| <b>Healthful plant-based diet index (hPDI)</b>       |              |             |            |            |            |        |
| <i>n</i>                                             | 174          | 174         | 146        | 181        | 156        |        |
| Median (range)                                       | -9 (-20, -6) | -3 (-5, -2) | 0 (-1, 1)  | 4 (2, 6)   | 10 (7, 24) |        |
| <b><i>Healthy plant foods, servings/day</i></b>      |              |             |            |            |            |        |
| Whole grains                                         | -0.5 ± 1.2   | -0.3 ± 1.2  | -0.2 ± 1.2 | 0.1 ± 1.3  | 0.1 ± 1.4  | <0.001 |
| Fruits                                               | 0.0 ± 1.0    | 0.2 ± 1.1   | 0.2 ± 0.9  | 0.4 ± 1.2  | 0.6 ± 1.1  | <0.001 |
| Vegetables                                           | -0.2 ± 2.1   | 0.5 ± 1.8   | 0.6 ± 2.0  | 0.4 ± 1.6  | 1.0 ± 2.3  | <0.001 |
| Nuts                                                 | 0.5 ± 0.8    | 0.6 ± 0.8   | 0.5 ± 0.8  | 0.7 ± 1.2  | 0.9 ± 1.2  | <0.001 |
| Legumes                                              | -0.1 ± 0.4   | 0.1 ± 0.6   | 0.1 ± 0.5  | 0.1 ± 0.5  | 0.2 ± 0.7  | <0.001 |
| Vegetable oil                                        | 0.2 ± 0.8    | 0.3 ± 0.5   | 0.4 ± 0.7  | 0.3 ± 0.5  | 0.5 ± 0.7  | <0.001 |
| Tea and coffee                                       | -0.1 ± 1.8   | -0.1 ± 1.7  | -0.1 ± 1.7 | 0.1 ± 1.8  | 0.3 ± 1.6  | 0.010  |
| <b><i>Less healthy plant foods, servings/day</i></b> |              |             |            |            |            |        |
| Fruit juices                                         | -0.1 ± 0.7   | -0.2 ± 0.7  | -0.4 ± 0.7 | -0.5 ± 0.8 | -0.4 ± 0.6 | <0.001 |
| Refined grains                                       | -0.3 ± 1.1   | -0.6 ± 1.2  | -0.6 ± 1.0 | -1.1 ± 1.3 | -1.5 ± 1.2 | <0.001 |
| Potatoes                                             | 0.0 ± 0.3    | -0.1 ± 0.3  | -0.2 ± 0.3 | -0.2 ± 0.4 | -0.3 ± 0.3 | <0.001 |
| Sugar-sweetened beverages                            | -0.1 ± 0.7   | -0.2 ± 0.6  | -0.2 ± 0.7 | -0.3 ± 0.6 | -0.4 ± 0.9 | <0.001 |
| Sweets and desserts                                  | -0.2 ± 1.0   | -0.5 ± 1.2  | -0.5 ± 1.0 | -0.6 ± 1.1 | -0.9 ± 1.2 | <0.001 |
| <b><i>Animal foods, servings/day</i></b>             |              |             |            |            |            |        |
| Animal fat                                           | 0.4 ± 0.5    | 0.3 ± 0.5   | 0.2 ± 0.7  | 0.2 ± 0.7  | 0.1 ± 0.5  | <0.001 |
| Daily                                                | 0.5 ± 1.5    | 0.2 ± 1.7   | 0.2 ± 1.7  | 0.0 ± 1.7  | -0.3 ± 1.8 | <0.001 |
| Eggs                                                 | 0.1 ± 0.4    | 0.2 ± 0.3   | 0.1 ± 0.3  | 0.1 ± 0.3  | 0.0 ± 0.4  | 0.002  |
| Fish and seafood                                     | 0.0 ± 0.2    | 0.0 ± 0.2   | 0.0 ± 0.2  | 0.0 ± 0.2  | 0.0 ± 0.3  | 0.41   |
| Meat                                                 | 0.1 ± 0.7    | 0.0 ± 0.7   | -0.2 ± 0.6 | -0.1 ± 0.6 | -0.3 ± 0.7 | <0.001 |
| Miscellaneous animal-based foods                     | -0.3 ± 2.0   | -0.1 ± 0.7  | -0.1 ± 0.9 | -0.3 ± 1.7 | -0.3 ± 1.2 | 0.21   |
| <b><i>Food groups, servings/day</i></b>              |              |             |            |            |            |        |
| Healthy plant foods                                  | -0.2 ± 4.3   | 1.3 ± 3.9   | 1.5 ± 4.0  | 2.2 ± 4.0  | 3.6 ± 4.2  | <0.001 |
| Less healthy plant foods                             | -0.7 ± 2.1   | -1.5 ± 2.0  | -1.9 ± 1.9 | -2.6 ± 2.0 | -3.6 ± 2.4 | <0.001 |
| Animal foods                                         | 1.0 ± 2.6    | 0.5 ± 2.1   | 0.4 ± 2.2  | -0.1 ± 2.7 | -0.8 ± 2.7 | <0.001 |

## Supplementary data

| <b>Unhealthful plant-based diet index (uPDI)</b>     |                |               |             |             |            |        |
|------------------------------------------------------|----------------|---------------|-------------|-------------|------------|--------|
| <i>n</i>                                             | 157            | 174           | 148         | 192         | 160        |        |
| Median (range)                                       | -17 (-31, -14) | -11 (-13, -9) | -7 (-8, -6) | -3 (-5, -1) | 3 (0, 20)  |        |
| <b><i>Healthy plant foods, servings/day</i></b>      |                |               |             |             |            |        |
| Whole grains                                         | 0.4 ± 1.4      | 0.1 ± 1.1     | -0.3 ± 1.3  | -0.3 ± 1.3  | -0.6 ± 1.1 | <0.001 |
| Fruits                                               | 0.8 ± 1.0      | 0.5 ± 1.1     | 0.3 ± 1.1   | 0.2 ± 1.0   | -0.2 ± 1.0 | <0.001 |
| Vegetables                                           | 1.3 ± 1.9      | 0.6 ± 1.9     | 0.3 ± 1.9   | 0.5 ± 2.0   | -0.5 ± 2.0 | <0.001 |
| Nuts                                                 | 1.0 ± 1.4      | 0.7 ± 0.7     | 0.5 ± 0.8   | 0.6 ± 0.9   | 0.3 ± 0.9  | <0.001 |
| Legumes                                              | 0.2 ± 0.6      | 0.1 ± 0.4     | 0.1 ± 0.6   | 0.1 ± 0.6   | -0.1 ± 0.4 | <0.001 |
| Vegetable oil                                        | 0.5 ± 0.6      | 0.5 ± 0.6     | 0.4 ± 0.6   | 0.3 ± 0.6   | 0.1 ± 0.7  | <0.001 |
| Tea and coffee                                       | 0.5 ± 2.0      | 0.1 ± 1.8     | 0.1 ± 1.6   | -0.1 ± 1.6  | -0.5 ± 1.6 | <0.001 |
| <b><i>Less healthy plant foods, servings/day</i></b> |                |               |             |             |            |        |
| Fruit juices                                         | -0.4 ± 0.6     | -0.4 ± 0.8    | -0.3 ± 0.7  | -0.3 ± 0.7  | -0.2 ± 0.8 | 0.004  |
| Refined grains                                       | -1.2 ± 1.4     | -1.0 ± 1.3    | -0.9 ± 1.2  | -0.7 ± 1.2  | -0.3 ± 1.0 | <0.001 |
| Potatoes                                             | -0.2 ± 0.4     | -0.2 ± 0.4    | -0.2 ± 0.3  | -0.1 ± 0.3  | -0.1 ± 0.3 | <0.001 |
| Sugar-sweetened beverages                            | -0.4 ± 1.0     | -0.3 ± 0.8    | -0.2 ± 0.6  | -0.2 ± 0.6  | -0.1 ± 0.5 | <0.001 |
| Sweets and desserts                                  | -0.8 ± 1.4     | -0.5 ± 0.9    | -0.5 ± 1.1  | -0.5 ± 1.0  | -0.4 ± 1.1 | <0.001 |
| <b><i>Animal foods, servings/day</i></b>             |                |               |             |             |            |        |
| Animal fat                                           | 0.3 ± 0.5      | 0.4 ± 0.8     | 0.3 ± 0.6   | 0.1 ± 0.5   | 0.2 ± 0.5  | <0.001 |
| Daily                                                | 0.6 ± 1.6      | 0.4 ± 1.7     | 0.1 ± 1.6   | -0.1 ± 1.6  | -0.3 ± 1.9 | <0.001 |
| Eggs                                                 | 0.2 ± 0.4      | 0.1 ± 0.3     | 0.1 ± 0.2   | 0.1 ± 0.3   | 0.0 ± 0.4  | <0.001 |
| Fish and seafood                                     | 0.1 ± 0.2      | 0.1 ± 0.3     | 0.0 ± 0.2   | 0.0 ± 0.2   | -0.1 ± 0.2 | <0.001 |
| Meat                                                 | 0.1 ± 0.6      | -0.1 ± 0.6    | -0.1 ± 0.7  | -0.2 ± 0.6  | -0.2 ± 0.8 | <0.001 |
| Miscellaneous animal-based foods                     | -0.2 ± 1.2     | -0.1 ± 0.7    | -0.1 ± 1.0  | -0.3 ± 1.4  | -0.4 ± 2.3 | 0.035  |
| <b><i>Food groups, servings/day</i></b>              |                |               |             |             |            |        |
| Healthy plant foods                                  | 4.6 ± 3.9      | 2.6 ± 3.6     | 1.3 ± 3.6   | 1.3 ± 3.7   | -1.5 ± 3.9 | <0.001 |
| Less healthy plant foods                             | -3.0 ± 2.7     | -2.5 ± 2.1    | -2.0 ± 2.1  | -1.7 ± 2.0  | -1.1 ± 2.2 | <0.001 |
| Animal foods                                         | 1.2 ± 2.4      | 0.8 ± 2.2     | 0.2 ± 2.2   | -0.4 ± 2.4  | -0.8 ± 3.0 | <0.001 |

## Supplementary data

<sup>1</sup>Values are means  $\pm$  SDs changes from baseline (1995) to follow-up (2011). Food group intakes are expressed as servings/day. P is calculated based on the univariate general linear regression model using each index score change as a continuous variable. *n*, the number of observations.

Supplementary data

**Supplemental Table 2** Cross-sectional associations of plasma adiposity-associated biomarker concentrations with quintiles of overall plant-based diet index (PDI) in 1995 and 2011 in the Nurses' Health study II <sup>1</sup>

|                                      | Quintile 1        | Quintile 2        | Quintile 3        | Quintile 4        | Quintile 5        | % difference/10-point changes (95% CIs) | P-trend |
|--------------------------------------|-------------------|-------------------|-------------------|-------------------|-------------------|-----------------------------------------|---------|
| Baseline, <i>n</i>                   | 212               | 206               | 135               | 155               | 123               |                                         |         |
| Follow-up, <i>n</i>                  | 112               | 173               | 147               | 215               | 184               |                                         |         |
| PDI, median (range)                  | 49 (30-51)        | 54 (52-55)        | 57 (56-58)        | 61 (59-62)        | 65 (63-78)        |                                         |         |
| <b>Adiponectin, ng/mL</b>            |                   |                   |                   |                   |                   |                                         |         |
| Multivariable <sup>2</sup>           | 7.1 (6.7, 7.5)    | 7.1 (6.7, 7.6)    | 7.3 (6.9, 7.7)    | 7.3 (6.9, 7.7)    | 7.3 (6.8, 7.7)    | 1.8 (-1.2, 4.9)                         | 0.25    |
| Multivariable+ BMI                   | 7.0 (6.7, 7.4)    | 7.0 (6.7, 7.4)    | 7.1 (6.7, 7.6)    | 7.2 (6.8, 7.6)    | 7.1 (6.7, 7.5)    | 1.1 (-1.8, 4.1)                         | 0.47    |
| <b>Leptin, ng/mL</b>                 |                   |                   |                   |                   |                   |                                         |         |
| Multivariable                        | 18.8 (16.9, 20.9) | 18.3 (16.5, 20.3) | 17.0 (15.2, 18.9) | 17.8 (16.1, 19.8) | 18.0 (16.1, 20.1) | -3.1 (-8.5, 2.7)                        | 0.29    |
| Multivariable+ BMI                   | 18.2 (16.7, 19.8) | 18.1 (16.6, 19.6) | 17.3 (15.9, 18.8) | 17.6 (16.2, 19.2) | 17.8 (16.3, 19.4) | -1.7 (-6.4, 3.3)                        | 0.50    |
| <b>sOB-R, ng/mL</b>                  |                   |                   |                   |                   |                   |                                         |         |
| Multivariable                        | 23.8 (22.9, 24.7) | 24.2 (23.3, 25.1) | 24.8 (23.9, 25.7) | 24.2 (23.3, 25.1) | 24.6 (23.7, 25.5) | 1.8 (-0.2, 3.8)                         | 0.08    |
| Multivariable+ BMI                   | 23.8 (23.0, 24.6) | 24.1 (23.3, 24.9) | 24.5 (23.6, 25.3) | 24.0 (23.2, 24.9) | 24.2 (23.4, 25.1) | 0.9 (-1.0, 2.9)                         | 0.34    |
| <b>Free leptin index<sup>3</sup></b> |                   |                   |                   |                   |                   |                                         |         |
| Multivariable                        | 0.8 (0.7, 0.9)    | 0.8 (0.7, 0.9)    | 0.7 (0.6, 0.8)    | 0.7 (0.6, 0.8)    | 0.7 (0.6, 0.8)    | -5.6 (-12.0, 1.2)                       | 0.11    |
| Multivariable+ BMI                   | 0.8 (0.7, 0.8)    | 0.8 (0.7, 0.8)    | 0.7 (0.6, 0.8)    | 0.7 (0.7, 0.8)    | 0.7 (0.7, 0.8)    | -3.2 (-8.8, 2.8)                        | 0.29    |
| <b>Insulin, uU/mL</b>                |                   |                   |                   |                   |                   |                                         |         |
| Multivariable                        | 6.1 (5.5, 6.7)    | 5.4 (4.9, 6.0)    | 5.4 (4.9, 6.0)    | 5.3 (4.8, 5.9)    | 5.2 (4.7, 5.8)    | -8.1 (-13.6, -2.3)                      | 0.007   |
| Multivariable+ BMI                   | 6.0 (5.4, 6.6)    | 5.4 (4.9, 5.9)    | 5.6 (5.0, 6.1)    | 5.4 (4.9, 6.0)    | 5.5 (5.0, 6.1)    | -4.1 (-9.4, 1.5)                        | 0.15    |
| <b>RBP-4, µg/mL</b>                  |                   |                   |                   |                   |                   |                                         |         |
| Multivariable                        | 36.7 (35.5, 37.8) | 36.7 (35.6, 37.9) | 35.5 (34.4, 36.6) | 35.6 (34.5, 36.8) | 36.0 (34.8, 37.1) | -1.8 (-3.6, 0.0)                        | 0.05    |
| Multivariable+ BMI                   | 36.5 (35.4, 37.7) | 36.6 (35.5, 37.8) | 35.5 (34.4, 36.6) | 35.6 (34.5, 36.7) | 36.0 (34.9, 37.2) | -1.5 (-3.3, 0.3)                        | 0.11    |
| <b>hsCRP, mg/L</b>                   |                   |                   |                   |                   |                   |                                         |         |
| Multivariable                        | 1.11 (0.92, 1.33) | 1.08 (0.90, 1.28) | 1.02 (0.85, 1.22) | 0.98 (0.82, 1.17) | 0.90 (0.75, 1.09) | -11.8 (-20.5, -2.2)                     | 0.018   |
| Multivariable+ BMI                   | 1.08 (0.91, 1.28) | 1.08 (0.92, 1.28) | 1.06 (0.90, 1.26) | 1.00 (0.84, 1.18) | 0.96 (0.81, 1.14) | -7.5 (-16.1, 2.0)                       | 0.12    |
| <b>IL-6, pg/mL</b>                   |                   |                   |                   |                   |                   |                                         |         |
| Multivariable                        | 0.86 (0.78, 0.94) | 0.89 (0.81, 0.97) | 0.92 (0.84, 1.01) | 0.92 (0.84, 1.01) | 0.88 (0.80, 0.96) | 2.4 (-3.1, 8.2)                         | 0.40    |
| Multivariable+ BMI                   | 0.84 (0.76, 0.91) | 0.88 (0.80, 0.96) | 0.93 (0.85, 1.02) | 0.92 (0.85, 1.01) | 0.90 (0.82, 0.99) | 5.5 (0.0, 11.3)                         | 0.05    |

<sup>1</sup>Values are least squares geometric means (95% CIs) from linear mixed model to account for within-person correlation between the two blood measurement time points.

<sup>2</sup>Adjusted for age, time period, total energy intake, alcohol intake, smoking status, physical activity, menopausal status, postmenopausal hormone use, hypertension, and hypercholesterolemia.

<sup>3</sup>Free leptin index is defined as the ratio of leptin to soluble leptin receptor.

BMI, body mass index; hsCRP, high-sensitivity C-reactive protein; IL-6, interleukin-6; *n*, the number of observations; PDI, overall plant-based diet index; RBP-4, retinol-binding protein-4; sOB-R, soluble leptin receptor.

Supplementary data

**Supplemental Table 3** Percentage changes in plasma adiposity-associated biomarker concentrations across quintiles of overall plant-based diet index (PDI) change between 1995 and 2011 in the Nurses' Health study II<sup>1</sup>

|                                      | Quintile1         | Quintile 2         | Quintile 3         | Quintile 4          | Quintile 5         | P-trend |
|--------------------------------------|-------------------|--------------------|--------------------|---------------------|--------------------|---------|
| <i>n</i>                             | 161               | 162                | 197                | 131                 | 180                |         |
| Median (range)                       | -6 (-18, -4)      | -1.5 (-3, 0)       | 3 (1, 4)           | 6 (5, 7)            | 10 (8, 27)         |         |
| <b>Adiponectin</b>                   |                   |                    |                    |                     |                    |         |
| Multivariable <sup>2</sup>           | 0.5 (-7.7, 9.5)   | 5.9 (-2.7, 15.3)   | 1.0 (-6.9, 9.6)    | 1.0 (-7.3, 10.0)    | 0.5 (-8.0, 9.8)    | 0.55    |
| Multivariable+ Wt change             | 3.2 (-4.9, 12.0)  | 8.6 (0.1, 17.7)    | 2.3 (-5.4, 10.5)   | 4.1 (-4.0, 13.0)    | 3.1 (-5.2, 12.1)   | 0.52    |
| <b>Leptin</b>                        |                   |                    |                    |                     |                    |         |
| Multivariable                        | 39.2 (18.2, 64.0) | 24.8 (6.1, 46.8)   | 38.9 (18.8, 62.3)  | 43.7 (22.0, 69.2)   | 34.0 (13.2, 58.7)  | 0.71    |
| Multivariable+ Wt change             | 29.0 (12.5, 48.0) | 17.1 (2.2, 34.1)   | 32.8 (16.6, 51.4)  | 30.8 (14.0, 50.1)   | 22.7 (6.5, 41.3)   | 0.88    |
| <b>sOB-R</b>                         |                   |                    |                    |                     |                    |         |
| Multivariable                        | -3.4 (-8.6, 2.2)  | -1.4 (-6.7, 4.2)   | -2.3 (-7.4, 3.0)   | -4.3 (-9.5, 1.2)    | -2.5 (-8.0, 3.2)   | 0.91    |
| Multivariable+ Wt change             | -2.0 (-7.1, 3.4)  | -0.1 (-5.3, 5.3)   | -1.7 (-6.5, 3.5)   | -2.5 (-7.6, 2.8)    | -0.9 (-6.2, 4.7)   | 0.99    |
| <b>Free leptin index<sup>3</sup></b> |                   |                    |                    |                     |                    |         |
| Multivariable                        | 43.3 (17.2, 75.2) | 29.5 (6.2, 58.0)   | 40.7 (16.2, 70.4)  | 50.9 (23.5, 84.5)   | 38.5 (12.7, 70.3)  | 0.73    |
| Multivariable+ Wt change             | 32.0 (11.0, 56.9) | 21.4 (2.3, 44.0)   | 34.9 (14.4, 58.9)  | 37.0 (15.2, 62.9)   | 26.4 (5.9, 51.0)   | 0.83    |
| <b>Insulin</b>                       |                   |                    |                    |                     |                    |         |
| Multivariable                        | 23.1 (2.0, 48.5)  | 28.6 (6.9, 54.6)   | 29.0 (8.0, 54.1)   | 23.1 (2.1, 48.4)    | 18.6 (-2.0, 43.5)  | 0.57    |
| Multivariable+ Wt change             | 18.7 (-0.7, 41.9) | 24.8 (4.7, 48.7)   | 26.4 (6.8, 49.7)   | 17.3 (-1.9, 40.2)   | 13.3 (-5.5, 35.9)  | 0.45    |
| <b>RBP-4</b>                         |                   |                    |                    |                     |                    |         |
| Multivariable                        | 12.6 (6.6, 18.9)  | 11.0 (5.1, 17.1)   | 14.1 (8.3, 20.3)   | 9.4 (3.6, 15.6)     | 9.3 (3.4, 15.7)    | 0.29    |
| Multivariable+ Wt change             | 12.1 (6.1, 18.4)  | 10.6 (4.8, 16.7)   | 13.9 (8.1, 19.9)   | 8.9 (3.0, 15.0)     | 8.8 (2.8, 15.1)    | 0.27    |
| <b>hsCRP</b>                         |                   |                    |                    |                     |                    |         |
| Multivariable                        | 9.0 (-17.6, 44.3) | 3.9 (-21.2, 37.0)  | 0.6 (-23.0, 31.5)  | -3.4 (-27.1, 27.9)  | 12.7 (-15.5, 50.4) | 0.98    |
| Multivariable+ Wt change             | 2.6 (-21.5, 34.1) | -2.0 (-24.8, 27.7) | -2.2 (-24.2, 26.2) | -10.7 (-31.7, 16.8) | 4.6 (-20.6, 37.7)  | 0.92    |
| <b>IL-6</b>                          |                   |                    |                    |                     |                    |         |
| Multivariable                        | 12.7 (-4.5, 33.1) | 9.0 (-7.5, 28.5)   | 10.6 (-5.5, 29.6)  | 19.7 (1.3, 41.4)    | 19.3 (0.6, 41.6)   | 0.27    |
| Multivariable+ Wt change             | 11.4 (-5.6, 31.5) | 7.7 (-8.7, 27.0)   | 10.3 (-5.8, 29.1)  | 17.8 (-0.4, 39.2)   | 17.8 (-0.7, 39.8)  | 0.27    |

<sup>1</sup>Values are adjusted least squares percent changes (95% CIs) in plasma biomarker concentrations from general linear model.

<sup>2</sup>Adjusted for age at the first blood measurement, changes in total energy intake, alcohol intake, smoking status, physical activity, menopausal status, postmenopausal hormone use, hypertension, hypercholesterolemia, baseline BMI, baseline overall plant-based diet index, and baseline corresponding biomarker concentrations.

<sup>3</sup>Free leptin index is defined as the ratio of leptin to soluble leptin receptor.

hsCRP, high-sensitivity C-reactive protein; IL-6, interleukin-6; *n*, the number of observations; PDI, overall plant-based diet index; RBP-4, retinol-binding protein-4; sOB-R, soluble leptin receptor; Wt, weight.
